# Supplementary material for: Non-Alcoholic Fatty Liver Disease Is an Independent Risk Factor for LDL Cholesterol Target Level
Source: MDPI journal article supplement (doi:10.3390/ijerph18073442), 2021-03-26
Supplement: s1 [file s1]

**Table S1.** Relationship between HSI and non-achievement of LDL cholesterol target.

| Unadjusted            |                     | Adjusted*   |                           |
|-----------------------|---------------------|-------------|---------------------------|
| HR (95% CI)           | <i>p</i>            | HR (95% CI) | <i>p</i>                  |
| HSI (per 1 increment) | 1.057 (1.047–1.067) | <0.001      | 1.101 (0.984–1.231) 0.094 |

\*: Adjusted for age, sex, BMI, regular exercise, current smoker, current drinker, mean blood pressure, daily caloric intake, serum ALT level, serum CRP level, chronic diseases, treatment with anti-dyslipidemic medications, and changes in LDL cholesterol level per year.

Abbreviations: HSI, hepatic steatosis index; LDL, low-density lipoprotein; HR, hazard ratio; CI, confidence interval; BMI, body mass index; ALT, alanine aminotransferase; CRP, C-reactive protein.

**Table S2.** Relationship between NAFLD status using HSI and non-achievement of LDL cholesterol target

| Fatty liver ruled out |               | Fatty liver neither ruled in nor ruled out |          | Fatty liver ruled in |          |
|-----------------------|---------------|--------------------------------------------|----------|----------------------|----------|
|                       |               | HRs (95% CIs)                              | <i>p</i> | HRs (95% CIs)        | <i>p</i> |
| Unadjusted            | 1 (reference) | 1.418 (1.276–1.576)                        | <0.001   | 1.887 (1.670–2.132)  | <0.001   |
| Model 1               | 1 (reference) | 1.327 (1.158–1.521)                        | <0.001   | 1.534 (1.243–1.894)  | <0.001   |
| Model 2               | 1 (reference) | 1.176 (1.025–1.350)                        | 0.021    | 1.120 (0.900–1.393)  | 0.302    |
| Model 3               | 1 (reference) | 1.134 (0.982–1.308)                        | 0.086    | 1.209 (0.965–1.514)  | 0.099    |

Model 1: Adjusted for age, sex, BMI, regular exercise, current smoker, current drinker, mean blood pressure, and daily caloric intake.

Model 2: Adjusted for variables in Model 1 plus serum ALT level, serum CRP level, and chronic diseases.

Model 3: Adjusted for variables in Model 2 plus treatment with anti-dyslipidemic medications, and changes in LDL cholesterol level per year.

Abbreviations: NAFLD, non-alcoholic fatty liver disease; HSI, hepatic steatosis index; LDL, low-density lipoprotein; HRs, hazard ratios; CIs, confidence intervals; BMI, body mass index; ALT, alanine aminotransferase; CRP, C-reactive protein.
